# Supplementary material
Source: publisher site journal article supplement (https://www.dovepress.com/article/252893)
Supplement: Supplementary file 1 [file get_supplementary_file.php]

**
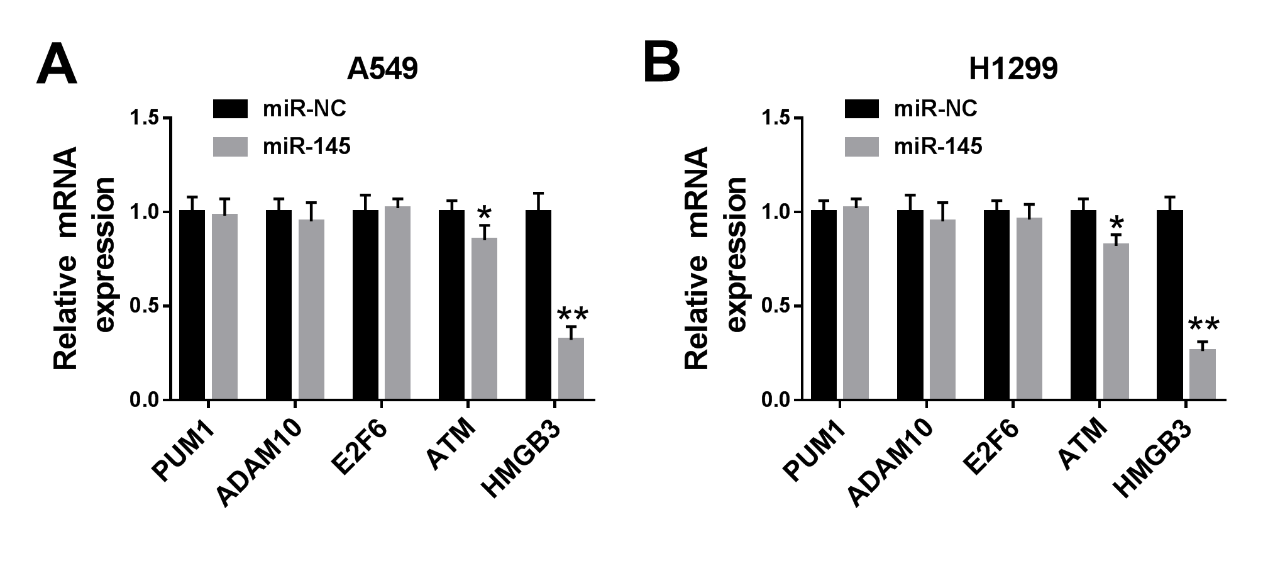
**

**Supplementary Figure 1. The candidate targets of miR-145 that predicted by Targetscan software.** (A) A549 and H1299 cells were transfected with miR-NC or miR-145, and the mRNA abundance of PUM1, ADAM10, E2F6, ATM and HMGB3 was examined using qRT-PCR. **P*<0.05, ***P*<0.01.
